# Supplementary material for: Anti-Glycation Properties of Zinc-Enriched Arthrospira platensis (Spirulina) Contribute to Prevention of Metaflammation in a Diet-Induced Obese Mouse Model
Source: MDPI journal article supplement (doi:10.3390/nu16040552), 2024-02-17

**Supplementary Table S1: List of primary antibodies used for Western blot technique.**

Primary antibodies were purchased from Abnova Corporation (Walnut, CA), Cosmo Bio (Carlsbad, CA), Santa Cruz Biotechnology, Inc. (Dallas,TX) , GeneTex, Inc. (Irvine, CA) Cell Signaling Technology, Inc. (Denver, MA), Adipogen Corporation(San Diego, CA).

| <b>Code</b>      | <b>Antibody</b>        |
|------------------|------------------------|
| PAB1293          | anti-CML               |
| KAL-KH025        | anti-CEL               |
| sc-365154        | anti-RAGE              |
| sc-13032         | anti-Nrf2              |
| Gtx15747         | anti-Glo-1             |
| 8242S            | anti-NF $\kappa$ B p65 |
| AG-20B-0014-C100 | anti-NLRP3             |
| 93709            | anti-Gasdermin         |
| 5174S            | anti-GAPDH             |
| 4499S            | anti-Histone H3        |

**Supplementary Figure S1:** Bacterial taxa that resulted differently represented among experimental groups in feces. ASV, Amplicon Sequence Variants. P, statistical significance according to Mann-Whitney test performed on centered log-ratio (CLR)-transformed abundances.

| [SD] vs [HFHS] |                                                                                                        |        |      |      |
|----------------|--------------------------------------------------------------------------------------------------------|--------|------|------|
| ASV            | Taxonomy                                                                                               | P      | SD   | HFHS |
|                | <i>p_Acidobacteria</i>                                                                                 | 0.0432 | 0.00 | 0.32 |
|                | <i>p_Actinobacteria;c_Actinobacteria;o_Bifidobacteriales;f_Bifidobacteriaceae;g_Bifidobacterium;s_</i> | 0.0395 | 0.34 | 0.00 |
|                | <i>p_Firmicutes;c_Bacilli;o_Bacillales;f_Staphylococcaceae;g_Staphylococcus</i>                        | 0.0393 | 0.00 | 0.74 |
|                | <i>p_Firmicutes;c_Bacilli;o_Bacillales;f_Staphylococcaceae;g_Staphylococcus;s_sciuri</i>               | 0.0432 | 0.00 | 0.68 |
|                | <i>p_Firmicutes;c_Bacilli;o_Lactobacillales;f_Enterococcaceae</i>                                      | 0.0395 | 0.00 | 0.18 |
|                | <i>p_Firmicutes;c_Bacilli;o_Lactobacillales;f_Enterococcaceae;_</i>                                    | 0.0395 | 0.00 | 0.18 |
|                | <i>p_Firmicutes;c_Bacilli;o_Lactobacillales;f_Enterococcaceae;_;</i>                                   | 0.0395 | 0.00 | 0.18 |
|                | <i>p_Firmicutes;c_Clostridia;o_Clostridiales;f_Lachnospiraceae;g_Ruminococcus;s_</i>                   | 0.0395 | 0.00 | 0.64 |
|                | <i>p_Proteobacteria;c_Deltaproteobacteria;o_Desulfovibrionales;f_Desulfovibrionaceae;g_</i>            | 0.0110 | 1.32 | 0.00 |
|                | <i>p_Proteobacteria;c_Deltaproteobacteria;o_Desulfovibrionales;f_Desulfovibrionaceae;g_s</i>           | 0.0110 | 1.32 | 0.00 |

  

| [SD] vs [HFHS+Zn-SP] |                                                                                                               |        |      |                |
|----------------------|---------------------------------------------------------------------------------------------------------------|--------|------|----------------|
| ASV                  | Taxonomy                                                                                                      | P      | SD   | HFHS+<br>Zn-SP |
|                      | <i>p_Actinobacteria</i>                                                                                       | 0.0070 | 6.24 | 4.77           |
| _0011                | <i>p_Actinobacteria;c_Actinobacteria;o_Bifidobacteriales;f_Bifidobacteriaceae;g_Bifidobacterium</i>           | 0.0236 | 2.42 | 0.00           |
| _0028                | <i>p_Actinobacteria;c_Actinobacteria;o_Bifidobacteriales;f_Bifidobacteriaceae;g_Bifidobacterium</i>           | 0.0307 | 0.73 | 0.00           |
| _0053                | <i>p_Actinobacteria;c_Actinobacteria;o_Bifidobacteriales;f_Bifidobacteriaceae;g_Bifidobacterium</i>           | 0.0307 | 0.63 | 0.00           |
|                      | <i>p_Actinobacteria;c_Actinobacteria;o_Bifidobacteriales;f_Bifidobacteriaceae;g_Bifidobacterium;s_</i>        | 0.0307 | 0.34 | 0.00           |
|                      | <i>p_Actinobacteria;c_Coriobacteriales;o_Coriobacteriales;f_Coriobacteriaceae;g_Adlercreutzia</i>             | 0.0262 | 2.33 | 4.35           |
|                      | <i>p_Actinobacteria;c_Coriobacteriales;o_Coriobacteriales;f_Coriobacteriaceae;g_Adlercreutzia;s_</i>          | 0.0262 | 2.33 | 4.35           |
| _0090                | <i>p_Actinobacteria;c_Coriobacteriales;o_Coriobacteriales;f_Coriobacteriaceae;g_Adlercreutzia;s_</i>          | 0.0307 | 0.00 | 1.22           |
| _0135                | <i>p_Actinobacteria;c_Coriobacteriales;o_Coriobacteriales;f_Coriobacteriaceae;g_Adlercreutzia;s_</i>          | 0.0307 | 0.00 | 0.64           |
|                      | <i>p_Actinobacteria;c_Coriobacteriales;o_Coriobacteriales;f_Coriobacteriaceae;g_Collinsella</i>               | 0.0291 | 0.57 | 1.23           |
|                      | <i>p_Actinobacteria;c_Coriobacteriales;o_Coriobacteriales;f_Coriobacteriaceae;g_Collinsella;s_aerofaciens</i> | 0.0114 | 0.00 | 0.79           |
|                      | <i>p_Bacteroidetes;c_Bacteroidia;o_Bacteroidales;f_[Odoribacteriaceae]</i>                                    | 0.0338 | 0.00 | 0.78           |
|                      | <i>p_Bacteroidetes;c_Bacteroidia;o_Bacteroidales;f_[Odoribacteriaceae];g_Odoribacter</i>                      | 0.0338 | 0.00 | 0.78           |
|                      | <i>p_Bacteroidetes;c_Bacteroidia;o_Bacteroidales;f_[Odoribacteriaceae];g_Odoribacter;s_</i>                   | 0.0338 | 0.00 | 0.78           |
|                      | <i>p_Bacteroidetes;c_Bacteroidia;o_Bacteroidales;f_Bacteroidaceae</i>                                         | 0.0111 | 3.23 | 2.66           |
|                      | <i>p_Bacteroidetes;c_Bacteroidia;o_Bacteroidales;f_Bacteroidaceae;g_Bacteroides</i>                           | 0.0111 | 3.23 | 2.66           |
|                      | <i>p_Bacteroidetes;c_Bacteroidia;o_Bacteroidales;f_Bacteroidaceae;g_Bacteroides;s_</i>                        | 0.0379 | 2.71 | 2.17           |
|                      | <i>p_Bacteroidetes;c_Bacteroidia;o_Bacteroidales;f_Prevotellaceae;g_Prevotella;s_melaninogenica</i>           | 0.0209 | 0.98 | 1.42           |
|                      | <i>p_Bacteroidetes;c_Bacteroidia;o_Bacteroidales;f_Rikenellaceae</i>                                          | 0.0070 | 3.17 | 2.60           |
|                      | <i>p_Bacteroidetes;c_Bacteroidia;o_Bacteroidales;f_Rikenellaceae;g_</i>                                       | 0.0070 | 3.07 | 2.51           |
|                      | <i>p_Bacteroidetes;c_Bacteroidia;o_Bacteroidales;f_Rikenellaceae;g_s_</i>                                     | 0.0070 | 3.07 | 2.51           |
|                      | <i>p_Firmicutes</i>                                                                                           | 0.0070 | 6.15 | 7.13           |
|                      | <i>p_Firmicutes;c_Bacilli</i>                                                                                 | 0.0070 | 3.73 | 4.20           |
|                      | <i>p_Firmicutes;c_Bacilli;o_Lactobacillales</i>                                                               | 0.0070 | 3.72 | 4.01           |
| _0139                | <i>p_Firmicutes;c_Bacilli;o_Lactobacillales;f_Lactobacillaceae;g_Lactobacillus;s_</i>                         | 0.0307 | 0.96 | 0.00           |
|                      | <i>p_Firmicutes;c_Clostridia</i>                                                                              | 0.0262 | 5.78 | 5.02           |
|                      | <i>p_Firmicutes;c_Clostridia;o_Clostridiales</i>                                                              | 0.0262 | 5.78 | 5.02           |
|                      | <i>p_Firmicutes;c_Clostridia;o_Clostridiales;f_</i>                                                           | 0.0111 | 4.84 | 4.30           |
|                      | <i>p_Firmicutes;c_Clostridia;o_Clostridiales;f_g_</i>                                                         | 0.0111 | 4.84 | 4.30           |
|                      | <i>p_Firmicutes;c_Clostridia;o_Clostridiales;f_g_s_</i>                                                       | 0.0111 | 4.84 | 4.30           |
|                      | <i>p_Firmicutes;c_Clostridia;o_Clostridiales;f_Mogibacteriaceae;g_Anaerovorax</i>                             | 0.0307 | 0.23 | 0.00           |
|                      | <i>p_Firmicutes;c_Clostridia;o_Clostridiales;f_Mogibacteriaceae;g_Anaerovorax;s_</i>                          | 0.0307 | 0.23 | 0.00           |
|                      | <i>p_Firmicutes;c_Clostridia;o_Clostridiales;f_Dehalobacteriaceae</i>                                         | 0.0187 | 1.26 | 0.00           |
|                      | <i>p_Firmicutes;c_Clostridia;o_Clostridiales;f_Dehalobacteriaceae;g_Dehalobacterium</i>                       | 0.0187 | 1.26 | 0.00           |
|                      | <i>p_Firmicutes;c_Clostridia;o_Clostridiales;f_Dehalobacteriaceae;g_Dehalobacterium;s_</i>                    | 0.0187 | 1.26 | 0.00           |
|                      | <i>p_Firmicutes;c_Clostridia;o_Clostridiales;f_Lachnospiraceae</i>                                            | 0.0175 | 3.87 | 2.95           |
|                      | <i>p_Firmicutes;c_Clostridia;o_Clostridiales;f_Lachnospiraceae;g_</i>                                         | 0.0175 | 3.00 | 1.52           |
|                      | <i>p_Firmicutes;c_Clostridia;o_Clostridiales;f_Lachnospiraceae;g_s_</i>                                       | 0.0175 | 3.00 | 1.52           |
|                      | <i>p_Firmicutes;c_Clostridia;o_Clostridiales;f_Lachnospiraceae;g_Coproccoccus</i>                             | 0.0476 | 1.11 | 0.00           |
|                      | <i>p_Firmicutes;c_Clostridia;o_Clostridiales;f_Lachnospiraceae;g_Coproccoccus;s_</i>                          | 0.0476 | 1.11 | 0.00           |
|                      | <i>p_Firmicutes;c_Clostridia;o_Clostridiales;f_Ruminococcaceae</i>                                            | 0.0070 | 4.84 | 3.62           |
|                      | <i>p_Firmicutes;c_Clostridia;o_Clostridiales;f_Ruminococcaceae;g_</i>                                         | 0.0041 | 4.02 | 2.88           |
|                      | <i>p_Firmicutes;c_Clostridia;o_Clostridiales;f_Ruminococcaceae;g_s_</i>                                       | 0.0041 | 4.02 | 2.88           |
|                      | <i>p_Firmicutes;c_Clostridia;o_Clostridiales;f_Ruminococcaceae;g_Ruminococcus</i>                             | 0.0452 | 2.39 | 0.81           |
|                      | <i>p_Firmicutes;c_Erysipelotrichi</i>                                                                         | 0.0041 | 4.30 | 6.95           |
|                      | <i>p_Firmicutes;c_Erysipelotrichi;o_Erysipelotrichales</i>                                                    | 0.0041 | 4.30 | 6.95           |
|                      | <i>p_Firmicutes;c_Erysipelotrichi;o_Erysipelotrichales;f_Erysipelotrichaceae</i>                              | 0.0041 | 4.30 | 6.95           |
|                      | <i>p_Firmicutes;c_Erysipelotrichi;o_Erysipelotrichales;f_Erysipelotrichaceae;g_Allobaculum</i>                | 0.0041 | 4.24 | 6.95           |
|                      | <i>p_Firmicutes;c_Erysipelotrichi;o_Erysipelotrichales;f_Erysipelotrichaceae;g_Allobaculum;s_</i>             | 0.0041 | 4.24 | 6.95           |
|                      | <i>p_Proteobacteria;c_Alphaproteobacteria;o_RF32</i>                                                          | 0.0175 | 1.02 | 1.30           |
|                      | <i>p_Proteobacteria;c_Alphaproteobacteria;o_RF32;f_</i>                                                       | 0.0175 | 1.02 | 1.30           |
|                      | <i>p_Proteobacteria;c_Alphaproteobacteria;o_RF32;f_g_</i>                                                     | 0.0175 | 1.02 | 1.30           |
|                      | <i>p_Proteobacteria;c_Alphaproteobacteria;o_RF32;f_g_s_</i>                                                   | 0.0175 | 1.02 | 1.30           |
|                      | <i>p_Proteobacteria;c_Betaproteobacteria</i>                                                                  | 0.0379 | 2.98 | 3.41           |
|                      | <i>p_Proteobacteria;c_Betaproteobacteria;o_Burkholderiales</i>                                                | 0.0070 | 2.18 | 2.74           |
|                      | <i>p_Tenericutes</i>                                                                                          | 0.0204 | 0.67 | 0.00           |
|                      | <i>p_Tenericutes;c_Mollicutes</i>                                                                             | 0.0204 | 0.67 | 0.00           |
|                      | <i>p_Tenericutes;c_Mollicutes;o_Anaeroplasmatales</i>                                                         | 0.0307 | 0.67 | 0.00           |
|                      | <i>p_Tenericutes;c_Mollicutes;o_Anaeroplasmatales;f_Anaeroplasmataceae</i>                                    | 0.0307 | 0.67 | 0.00           |
|                      | <i>p_Tenericutes;c_Mollicutes;o_Anaeroplasmatales;f_Anaeroplasmataceae;g_Anaeroplasma</i>                     | 0.0307 | 0.67 | 0.00           |
|                      | <i>p_Tenericutes;c_Mollicutes;o_Anaeroplasmatales;f_Anaeroplasmataceae;g_Anaeroplasma;s_</i>                  | 0.0307 | 0.67 | 0.00           |

| [HFHS] vs [HFHS+Zn-SP] |                                                                                                      |        |      |            |
|------------------------|------------------------------------------------------------------------------------------------------|--------|------|------------|
| ASV                    | Taxonomy                                                                                             | P      | HFHS | HFHS+Zn-SP |
| _0031                  | p_Actinobacteria;c_Actinobacteria;o_Bifidobacteriales;f_Bifidobacteriaceae;g_Bifidobacterium         | 0.0432 | 1.86 | 0.00       |
|                        | p_Actinobacteria;c_Coriobacteriia;o_Coriobacteriales;f_Coriobacteriaceae;g_Adlercreutzia             | 0.0001 | 2.38 | 4.35       |
|                        | p_Actinobacteria;c_Coriobacteriia;o_Coriobacteriales;f_Coriobacteriaceae;g_Adlercreutzia;s_          | 0.0001 | 2.38 | 4.35       |
| _0090                  | p_Actinobacteria;c_Coriobacteriia;o_Coriobacteriales;f_Coriobacteriaceae;g_Adlercreutzia;s_          | 0.0293 | 0.00 | 1.22       |
|                        | p_Actinobacteria;c_Coriobacteriia;o_Coriobacteriales;f_Coriobacteriaceae;g_Collinsella;s_aerofaciens | 0.0192 | 0.00 | 0.79       |
|                        | p_Bacteroidetes;c_Bacteroidia;o_Bacteroidales;f_[Odoribacteraceae]                                   | 0.0140 | 0.00 | 0.78       |
|                        | p_Bacteroidetes;c_Bacteroidia;o_Bacteroidales;f_[Odoribacteraceae];g_Odoribacter                     | 0.0140 | 0.00 | 0.78       |
|                        | p_Bacteroidetes;c_Bacteroidia;o_Bacteroidales;f_[Odoribacteraceae];g_Odoribacter;s_                  | 0.0140 | 0.00 | 0.78       |
|                        | p_Bacteroidetes;c_Bacteroidia;o_Bacteroidales;f_[Paraprevotellaceae]                                 | 0.0072 | 0.99 | 1.70       |
|                        | p_Bacteroidetes;c_Bacteroidia;o_Bacteroidales;f_[Paraprevotellaceae];g_[Prevotella]                  | 0.0072 | 0.99 | 1.70       |
|                        | p_Bacteroidetes;c_Bacteroidia;o_Bacteroidales;f_[Paraprevotellaceae];g_[Prevotella];s_               | 0.0072 | 0.99 | 1.70       |
|                        | p_Bacteroidetes;c_Bacteroidia;o_Bacteroidales;f_Porphyromonadaceae;g_Parabacteroides                 | 0.0336 | 1.78 | 0.56       |
|                        | p_Bacteroidetes;c_Bacteroidia;o_Bacteroidales;f_Porphyromonadaceae;g_Parabacteroides;s_              | 0.0262 | 1.78 | 0.56       |
|                        | p_Bacteroidetes;c_Bacteroidia;o_Bacteroidales;f_Prevotellaceae                                       | 0.0185 | 1.33 | 1.83       |
|                        | p_Bacteroidetes;c_Bacteroidia;o_Bacteroidales;f_Prevotellaceae;g_Prevotella                          | 0.0185 | 1.33 | 1.83       |
|                        | p_Bacteroidetes;c_Bacteroidia;o_Bacteroidales;f_Rikenellaceae;                                       | 0.0106 | 0.00 | 0.66       |
|                        | p_Bacteroidetes;c_Bacteroidia;o_Bacteroidales;f_Rikenellaceae;_;                                     | 0.0106 | 0.00 | 0.66       |
|                        | p_Bacteroidetes;c_Bacteroidia;o_Bacteroidales;f_S24-7                                                | 0.0185 | 4.16 | 4.95       |
|                        | p_Bacteroidetes;c_Bacteroidia;o_Bacteroidales;f_S24-7;g_                                             | 0.0185 | 4.16 | 4.95       |
|                        | p_Bacteroidetes;c_Bacteroidia;o_Bacteroidales;f_S24-7;g_;s_                                          | 0.0185 | 4.16 | 4.95       |
| _0100                  | p_Bacteroidetes;c_Bacteroidia;o_Bacteroidales;f_S24-7;g_;s_                                          | 0.0106 | 0.00 | 1.24       |
| _0151                  | p_Bacteroidetes;c_Bacteroidia;o_Bacteroidales;f_S24-7;g_;s_                                          | 0.0334 | 0.00 | 0.00       |
| 0234                   | p_Bacteroidetes;c_Bacteroidia;o_Bacteroidales;f_S24-7;g_;s_                                          | 0.0334 | 0.00 | 0.00       |
|                        | p_Firmicutes                                                                                         | 0.0020 | 6.10 | 7.13       |
|                        | p_Firmicutes;c_Bacilli                                                                               | 0.0431 | 3.87 | 4.20       |
|                        | p_Firmicutes;c_Bacilli;o_Lactobacillales;f_Lactobacillaceae                                          | 0.0330 | 3.17 | 3.52       |
|                        | p_Firmicutes;c_Bacilli;o_Lactobacillales;f_Lactobacillaceae;g_Lactobacillus                          | 0.0330 | 3.17 | 3.52       |
|                        | p_Firmicutes;c_Clostridia                                                                            | 0.0431 | 5.69 | 5.02       |
|                        | p_Firmicutes;c_Clostridia;o_Clostridiales                                                            | 0.0431 | 5.69 | 5.02       |
|                        | p_Firmicutes;c_Clostridia;o_Clostridiales;f_Clostridiaceae                                           | 0.0146 | 2.02 | 0.85       |
|                        | p_Firmicutes;c_Clostridia;o_Clostridiales;f_Lachnospiraceae;g_                                       | 0.0250 | 2.76 | 1.52       |
|                        | p_Firmicutes;c_Clostridia;o_Clostridiales;f_Lachnospiraceae;g_;s_                                    | 0.0250 | 2.76 | 1.52       |
|                        | p_Firmicutes;c_Clostridia;o_Clostridiales;f_Lachnospiraceae;g_Coproccoccus                           | 0.0432 | 2.05 | 0.00       |
|                        | p_Firmicutes;c_Clostridia;o_Clostridiales;f_Lachnospiraceae;g_Coproccoccus;s_                        | 0.0432 | 2.05 | 0.00       |
|                        | p_Firmicutes;c_Clostridia;o_Clostridiales;f_Ruminococcaceae;g_Ruminococcus                           | 0.0071 | 2.37 | 0.81       |
|                        | p_Firmicutes;c_Clostridia;o_Clostridiales;f_Ruminococcaceae;g_Ruminococcus;s_                        | 0.0320 | 2.30 | 0.00       |
|                        | p_Firmicutes;c_Erysipelotrichi                                                                       | 0.0012 | 4.28 | 6.95       |
|                        | p_Firmicutes;c_Erysipelotrichi;o_Erysipelotrichales                                                  | 0.0012 | 4.28 | 6.95       |
|                        | p_Firmicutes;c_Erysipelotrichi;o_Erysipelotrichales;f_Erysipelotrichaceae                            | 0.0012 | 4.28 | 6.95       |
|                        | p_Firmicutes;c_Erysipelotrichi;o_Erysipelotrichales;f_Erysipelotrichaceae;g_Allobaculum              | 0.0012 | 4.10 | 6.95       |
|                        | p_Firmicutes;c_Erysipelotrichi;o_Erysipelotrichales;f_Erysipelotrichaceae;g_Allobaculum;s_           | 0.0012 | 4.10 | 6.95       |
|                        | p_Proteobacteria;c_Betaproteobacteria                                                                | 0.0431 | 3.03 | 3.41       |
|                        | p_Proteobacteria;c_Betaproteobacteria;o_Burkholderiales                                              | 0.0031 | 2.15 | 2.74       |
|                        | p_Proteobacteria;c_Betaproteobacteria;o_Burkholderiales;f_Alcaligenaceae                             | 0.0063 | 0.00 | 0.82       |
|                        | p_Proteobacteria;c_Betaproteobacteria;o_Burkholderiales;f_Alcaligenaceae;g_Sutterella                | 0.0063 | 0.00 | 0.82       |
|                        | p_Proteobacteria;c_Betaproteobacteria;o_Burkholderiales;f_Alcaligenaceae;g_Sutterella;s_             | 0.0063 | 0.00 | 0.82       |
|                        | p_Proteobacteria;c_Betaproteobacteria;o_Burkholderiales;f_Comamonadaceae                             | 0.0330 | 1.00 | 1.29       |
|                        | p_Proteobacteria;c_Betaproteobacteria;o_Burkholderiales;f_Comamonadaceae;g_                          | 0.0280 | 0.98 | 1.27       |
|                        | p_Proteobacteria;c_Betaproteobacteria;o_Burkholderiales;f_Comamonadaceae;g_;s_                       | 0.0280 | 0.98 | 1.27       |
|                        | p_Proteobacteria;c_Betaproteobacteria;o_Burkholderiales;f_Oxalobacteraceae                           | 0.0453 | 1.80 | 2.27       |
|                        | p_Proteobacteria;c_Betaproteobacteria;o_Burkholderiales;f_Oxalobacteraceae;g_Ralstonia               | 0.0449 | 1.80 | 2.27       |
|                        | p_Proteobacteria;c_Betaproteobacteria;o_Burkholderiales;f_Oxalobacteraceae;g_Ralstonia;s_            | 0.0449 | 1.80 | 2.27       |
|                        | p_Proteobacteria;c_Deltaproteobacteria;o_Desulfovibrionales;f_Desulfovibrionaceae;g_                 | 0.0132 | 0.00 | 1.31       |
|                        | p_Proteobacteria;c_Deltaproteobacteria;o_Desulfovibrionales;f_Desulfovibrionaceae;g_;s_              | 0.0132 | 0.00 | 1.31       |

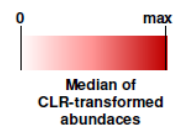

**Supplementary Figure S2:** Bacterial taxa that resulted differently represented among experimental groups in ileum. ASV, Amplicon Sequence Variants. P, statistical significance according to Mann-Whitney test performed on centered log-ratio (CLR)-transformed abundances.

| [SD] vs [HFHS] |                                                                                            |        |      |      |
|----------------|--------------------------------------------------------------------------------------------|--------|------|------|
| ASV            | Taxonomy                                                                                   | P      | SD   | HFHS |
| 0020           | p_Actinobacteria;c_Coriobacteriia;o_Coriobacteriales;f_Coriobacteriaceae;g_s               | 0.0292 | 1.60 | 0.00 |
| 0058           | p_Actinobacteria;c_Coriobacteriia;o_Coriobacteriales;f_Coriobacteriaceae;g_s               | 0.0292 | 1.01 | 0.00 |
| 0072           | p_Actinobacteria;c_Coriobacteriia;o_Coriobacteriales;f_Coriobacteriaceae;g_Adlercreutzia;s | 0.0048 | 1.43 | 0.00 |
| 0098           | p_Actinobacteria;c_Coriobacteriia;o_Coriobacteriales;f_Coriobacteriaceae;g_Adlercreutzia;s | 0.0105 | 1.76 | 0.00 |
| 0135           | p_Actinobacteria;c_Coriobacteriia;o_Coriobacteriales;f_Coriobacteriaceae;g_Adlercreutzia;s | 0.0358 | 0.62 | 0.00 |
|                | p_Bacteroidetes;c_Bacteroidia;o_Bacteroidales;f_Prevotellaceae;g_Prevotella;s_copri        | 0.0398 | 0.00 | 0.48 |
|                | p_Firmicutes;c_Bacilli;o_Gemellales                                                        | 0.0106 | 0.00 | 1.79 |
|                | p_Firmicutes;c_Bacilli;o_Gemellales;f_Gemellaceae                                          | 0.0106 | 0.00 | 1.79 |
|                | p_Firmicutes;c_Bacilli;o_Gemellales;f_Gemellaceae;g                                        | 0.0106 | 0.00 | 1.79 |
|                | p_Firmicutes;c_Bacilli;o_Gemellales;f_Gemellaceae;g_s                                      | 0.0106 | 0.00 | 1.79 |
| 0110           | p_Firmicutes;c_Bacilli;o_Lactobacillales;f_Lactobacillaceae;g_Lactobacillus;s              | 0.0458 | 1.37 | 0.00 |
|                | p_Firmicutes;c_Clostridia;o_Clostridiales;f_Lachnospiraceae;g_Ruminococcus;s_gnavus        | 0.0304 | 0.00 | 2.74 |
|                | p_Firmicutes;c_Clostridia;o_Clostridiales;f_Veillonellaceae                                | 0.0283 | 2.25 | 3.61 |
|                | p_Firmicutes;c_Clostridia;o_Clostridiales;f_Veillonellaceae;g_Dialister                    | 0.0216 | 0.00 | 1.37 |
|                | p_Firmicutes;c_Clostridia;o_Clostridiales;f_Veillonellaceae;g_Dialister;s                  | 0.0216 | 0.00 | 1.37 |
|                | p_Firmicutes;c_Clostridia;o_Clostridiales;f_Veillonellaceae;g_Megamonas                    | 0.0252 | 0.00 | 2.33 |
|                | p_Firmicutes;c_Clostridia;o_Clostridiales;f_Veillonellaceae;g_Megamonas;s                  | 0.0252 | 0.00 | 2.33 |
|                | p_Firmicutes;c_Clostridia;o_Clostridiales;f_Veillonellaceae;g_Megasphaera                  | 0.0028 | 0.00 | 1.79 |
|                | p_Firmicutes;c_Clostridia;o_Clostridiales;f_Veillonellaceae;g_Megasphaera;s                | 0.0028 | 0.00 | 1.79 |
|                | p_Firmicutes;c_Clostridia;o_Clostridiales;f_Veillonellaceae;g_Phacolarctobacterium         | 0.0351 | 0.00 | 1.91 |
|                | p_Firmicutes;c_Clostridia;o_Clostridiales;f_Veillonellaceae;g_Phacolarctobacterium;s       | 0.0351 | 0.00 | 1.91 |
| 0001           | p_Firmicutes;c_Erysipelotrichi;o_Erysipelotrichales;f_Erysipelotrichaceae;g_Allobaculum;s  | 0.0140 | 3.68 | 0.00 |
| 0004           | p_Firmicutes;c_Erysipelotrichi;o_Erysipelotrichales;f_Erysipelotrichaceae;g_Allobaculum;s  | 0.0179 | 3.56 | 0.00 |
| 0008           | p_Firmicutes;c_Erysipelotrichi;o_Erysipelotrichales;f_Erysipelotrichaceae;g_Allobaculum;s  | 0.0109 | 3.39 | 0.00 |
| 0009           | p_Firmicutes;c_Erysipelotrichi;o_Erysipelotrichales;f_Erysipelotrichaceae;g_Allobaculum;s  | 0.0109 | 3.42 | 0.00 |
| 0024           | p_Firmicutes;c_Erysipelotrichi;o_Erysipelotrichales;f_Erysipelotrichaceae;g_Allobaculum;s  | 0.0227 | 2.84 | 0.00 |
| 0030           | p_Firmicutes;c_Erysipelotrichi;o_Erysipelotrichales;f_Erysipelotrichaceae;g_Allobaculum;s  | 0.0084 | 2.83 | 0.00 |
|                | p_Proteobacteria;c_Deltaproteobacteria;o_Desulfobibrionales;f_Desulfobibrionaceae;g        | 0.0358 | 1.11 | 0.00 |
|                | p_Proteobacteria;c_Deltaproteobacteria;o_Desulfobibrionales;f_Desulfobibrionaceae;g_s      | 0.0358 | 1.11 | 0.00 |
|                | p_Proteobacteria;c_Gammaproteobacteria                                                     | 0.0052 | 2.37 | 2.88 |
|                | p_Proteobacteria;c_Gammaproteobacteria;o_Enterobacteriales                                 | 0.0437 | 0.00 | 2.06 |
|                | p_Proteobacteria;c_Gammaproteobacteria;o_Enterobacteriales;f_Enterobacteriaceae            | 0.0437 | 0.00 | 2.06 |
|                | p_Proteobacteria;c_Gammaproteobacteria;o_Enterobacteriales;f_Enterobacteriaceae;g          | 0.0437 | 0.00 | 2.06 |
|                | p_Proteobacteria;c_Gammaproteobacteria;o_Enterobacteriales;f_Enterobacteriaceae;g_s        | 0.0437 | 0.00 | 2.06 |
|                | p_Proteobacteria;c_Gammaproteobacteria;o_Pseudomonadales;f_Moraxellaceae;g_Moraxella       | 0.0357 | 0.00 | 0.33 |
|                | p_Proteobacteria;c_Gammaproteobacteria;o_Pseudomonadales;f_Moraxellaceae;g_Moraxella;s     | 0.0357 | 0.00 | 0.33 |

| [SD] vs [HFHS+Zn-SP] |                                                                                          |        |      |            |
|----------------------|------------------------------------------------------------------------------------------|--------|------|------------|
| ASV                  | Taxonomy                                                                                 | P      | SD   | HFHS+Zn-SP |
|                      | p_Actinobacteria                                                                         | 0.0262 | 6.99 | 3.57       |
|                      | p_Actinobacteria;c_Actinobacteria;o_Actinomycetales;f_Actinomycetaceae                   | 0.0407 | 0.00 | 0.95       |
|                      | p_Actinobacteria;c_Actinobacteria;o_Actinomycetales;f_Actinomycetaceae;g_Actinomyces     | 0.0407 | 0.00 | 0.95       |
|                      | p_Actinobacteria;c_Actinobacteria;o_Actinomycetales;f_Actinomycetaceae;g_Actinomyces;s   | 0.0407 | 0.00 | 0.95       |
|                      | p_Actinobacteria;c_Coriobacteriia                                                        | 0.0379 | 3.74 | 2.91       |
|                      | p_Actinobacteria;c_Coriobacteriia;o_Coriobacteriales                                     | 0.0379 | 3.74 | 2.91       |
|                      | p_Actinobacteria;c_Coriobacteriia;o_Coriobacteriales;f_Coriobacteriaceae                 | 0.0379 | 3.74 | 2.91       |
|                      | p_Actinobacteria;c_Coriobacteriia;o_Coriobacteriales;f_Coriobacteriaceae;g               | 0.0474 | 3.04 | 1.71       |
|                      | p_Actinobacteria;c_Coriobacteriia;o_Coriobacteriales;f_Coriobacteriaceae;g_s             | 0.0474 | 3.04 | 1.71       |
|                      | p_Bacteroidetes;c_Bacteroidia;o_Bacteroidales;f                                          | 0.0238 | 0.00 | 0.40       |
|                      | p_Bacteroidetes;c_Bacteroidia;o_Bacteroidales;f_g                                        | 0.0238 | 0.00 | 0.40       |
|                      | p_Bacteroidetes;c_Bacteroidia;o_Bacteroidales;f_g_s                                      | 0.0238 | 0.00 | 0.40       |
|                      | p_Bacteroidetes;c_Bacteroidia;o_Bacteroidales;f_Prevotellaceae;g_Prevotella;s            | 0.0338 | 0.63 | 0.00       |
|                      | p_Firmicutes;c_Clostridia                                                                | 0.0379 | 5.01 | 5.81       |
|                      | p_Firmicutes;c_Clostridia;o_Clostridiales                                                | 0.0379 | 5.01 | 5.81       |
|                      | p_Firmicutes;c_Clostridia;o_Clostridiales;f                                              | 0.0262 | 4.10 | 4.73       |
|                      | p_Firmicutes;c_Clostridia;o_Clostridiales;f_g                                            | 0.0262 | 4.10 | 4.73       |
|                      | p_Firmicutes;c_Clostridia;o_Clostridiales;f_g_s                                          | 0.0262 | 4.10 | 4.73       |
|                      | p_Firmicutes;c_Clostridia;o_Clostridiales;f_Clostridiaceae                               | 0.0282 | 0.00 | 0.83       |
|                      | p_Firmicutes;c_Clostridia;o_Clostridiales;f_Lachnospiraceae;g_Dorea                      | 0.0199 | 0.00 | 1.56       |
|                      | p_Firmicutes;c_Clostridia;o_Clostridiales;f_Lachnospiraceae;g_Dorea;s                    | 0.0199 | 0.00 | 1.56       |
|                      | p_Firmicutes;c_Clostridia;o_Clostridiales;f_Ruminococcaceae                              | 0.0379 | 3.61 | 4.82       |
|                      | p_Firmicutes;c_Clostridia;o_Clostridiales;f_Ruminococcaceae;g_Oscillospira               | 0.0387 | 0.00 | 3.96       |
|                      | p_Firmicutes;c_Clostridia;o_Clostridiales;f_Ruminococcaceae;g_Oscillospira;s             | 0.0387 | 0.00 | 3.96       |
|                      | p_Firmicutes;c_Clostridia;o_Clostridiales;f_Ruminococcaceae;g_Ruminococcus               | 0.0330 | 0.93 | 2.45       |
|                      | p_Firmicutes;c_Clostridia;o_Clostridiales;f_Ruminococcaceae;g_Ruminococcus;s             | 0.0263 | 0.00 | 2.45       |
|                      | p_Firmicutes;c_Clostridia;o_Clostridiales;f_Veillonellaceae;g_Megasphaera                | 0.0407 | 0.00 | 0.66       |
|                      | p_Firmicutes;c_Clostridia;o_Clostridiales;f_Veillonellaceae;g_Megasphaera;s              | 0.0407 | 0.00 | 0.66       |
| 0105                 | p_Proteobacteria;c_Betaproteobacteria;o_Burkholderiales;f_Oxalobacteraceae;g_Ralstonia;s | 0.0407 | 0.00 | 1.99       |



| [HFHS] vs [HFHS+Zn-SP] |                                                                                                          |        |                    |
|------------------------|----------------------------------------------------------------------------------------------------------|--------|--------------------|
| ASV                    | Taxonomy                                                                                                 | P      | HFHS<br>HFHS+Zn-SP |
| 0072                   | p_Actinobacteria                                                                                         | 0.0072 | 6.36 3.57          |
|                        | p_Actinobacteria;c_Coriobacteriia;o_Coriobacteriales,f_Coriobacteriaceae,g_Adlercreutzia;s               | 0.0292 | 0.00 0.81          |
|                        | p_Bacteroidetes;c_Bacteroidia;o_Bacteroidales,f_                                                         | 0.0135 | 0.00 0.40          |
|                        | p_Bacteroidetes;c_Bacteroidia;o_Bacteroidales,f_;g_                                                      | 0.0135 | 0.00 0.40          |
|                        | p_Bacteroidetes;c_Bacteroidia;o_Bacteroidales,f_;g_;s_                                                   | 0.0135 | 0.00 0.40          |
|                        | p_Bacteroidetes;c_Bacteroidia;o_Bacteroidales,f_Bacteroidaceae,g_Bacteroides;s_fragilis                  | 0.0375 | 1.53 0.06          |
|                        | p_Bacteroidetes;c_Bacteroidia;o_Bacteroidales,f_Prevotellaceae                                           | 0.0037 | 2.03 1.34          |
|                        | p_Bacteroidetes;c_Bacteroidia;o_Bacteroidales,f_Prevotellaceae,g_Prevotella                              | 0.0026 | 2.03 1.31          |
|                        | p_Bacteroidetes;c_Bacteroidia;o_Bacteroidales,f_Prevotellaceae,g_Prevotella;s_melaninogenica             | 0.0221 | 1.40 1.10          |
|                        | p_Bacteroidetes;c_Bacteroidia;o_Bacteroidales,f_Rikenellaceae                                            | 0.0358 | 2.02 3.48          |
|                        | p_Bacteroidetes;c_Bacteroidia;o_Bacteroidales,f_Rikenellaceae,g_                                         | 0.0358 | 2.02 3.48          |
|                        | p_Bacteroidetes;c_Bacteroidia;o_Bacteroidales,f_Rikenellaceae,g_;s_                                      | 0.0358 | 2.02 3.48          |
|                        | p_Bacteroidetes;c_Bacteroidia;o_Bacteroidales,f_S24;7;g_;s_                                              | 0.0497 | 0.00 0.58          |
|                        | p_Firmicutes;c_Bacilli;o_Bacillales                                                                      | 0.0449 | 1.62 1.17          |
|                        | p_Firmicutes;c_Bacilli;o_Bacillales,f_Bacillaceae                                                        | 0.0283 | 1.53 1.17          |
| 0100                   | p_Firmicutes;c_Bacilli;o_Bacillales,f_Bacillaceae,g_Bacillus                                             | 0.0283 | 1.53 1.17          |
|                        | p_Firmicutes;c_Bacilli;o_Bacillales,f_Bacillaceae,g_Bacillus;s_                                          | 0.0311 | 1.53 1.17          |
|                        | p_Firmicutes;c_Bacilli;o_Gemellales                                                                      | 0.0381 | 1.79 0.62          |
|                        | p_Firmicutes;c_Bacilli;o_Gemellales,f_Gemellaceae                                                        | 0.0381 | 1.79 0.62          |
|                        | p_Firmicutes;c_Bacilli;o_Gemellales,f_Gemellaceae,g_                                                     | 0.0381 | 1.79 0.62          |
|                        | p_Firmicutes;c_Bacilli;o_Gemellales,f_Gemellaceae,g_;s_                                                  | 0.0381 | 1.79 0.62          |
|                        | p_Firmicutes;c_Clostridia;o_Clostridiales,f_Peptococcaceae,g_Desulfosporosinus                           | 0.0497 | 0.00 0.51          |
|                        | p_Firmicutes;c_Clostridia;o_Clostridiales,f_Peptococcaceae,g_Desulfosporosinus;s_meridiei                | 0.0497 | 0.00 0.51          |
|                        | p_Firmicutes;c_Clostridia;o_Clostridiales,f_Veillonellaceae                                              | 0.0449 | 3.61 2.29          |
|                        | p_Firmicutes;c_Clostridia;o_Clostridiales,f_Veillonellaceae,g_Dialister                                  | 0.0351 | 1.37 0.00          |
|                        | p_Firmicutes;c_Clostridia;o_Clostridiales,f_Veillonellaceae,g_Dialister;s_                               | 0.0351 | 1.37 0.00          |
|                        | p_Fusobacteria                                                                                           | 0.0283 | 2.07 1.49          |
|                        | p_Fusobacteria;c_Fusobacteriia                                                                           | 0.0283 | 2.07 1.49          |
|                        | p_Fusobacteria;c_Fusobacteriia;o_Fusobacteriales                                                         | 0.0283 | 2.07 1.49          |
|                        | p_Fusobacteria;c_Fusobacteriia;o_Fusobacteriales,f_Fusobacteriaceae                                      | 0.0221 | 2.07 1.49          |
| 0105                   | p_Fusobacteria;c_Fusobacteriia;o_Fusobacteriales,f_Fusobacteriaceae,g_Fusobacterium                      | 0.0221 | 2.07 1.49          |
|                        | p_Fusobacteria;c_Fusobacteriia;o_Fusobacteriales,f_Fusobacteriaceae,g_Fusobacterium;s                    | 0.0221 | 2.07 1.49          |
|                        | p_Proteobacteria;c_Alphaproteobacteria                                                                   | 0.0451 | 0.96 1.31          |
|                        | p_Proteobacteria;c_Alphaproteobacteria;o_RF32                                                            | 0.0351 | 0.00 0.89          |
|                        | p_Proteobacteria;c_Alphaproteobacteria;o_RF32,f_                                                         | 0.0351 | 0.00 0.89          |
|                        | p_Proteobacteria;c_Alphaproteobacteria;o_RF32,f_;g_                                                      | 0.0351 | 0.00 0.89          |
|                        | p_Proteobacteria;c_Alphaproteobacteria;o_RF32,f_;g_;s_                                                   | 0.0351 | 0.00 0.89          |
|                        | p_Proteobacteria;c_Betaproteobacteria;o_Burkholderiales,f_Oxalobacteraceae,g_Ralstonia;s_                | 0.0072 | 0.00 1.99          |
|                        | p_Proteobacteria;c_Gammaproteobacteria;o_Pasteurellales,f_Pasteurellaceae,g_Haemophilus                  | 0.0358 | 1.87 1.32          |
|                        | p_Proteobacteria;c_Gammaproteobacteria;o_Pasteurellales,f_Pasteurellaceae,g_Haemophilus;s_parainfluenzae | 0.0358 | 1.87 1.32          |

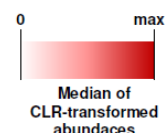

**Supplementary Figure S3:** The abundances of Rikenellaceae and Veilonellaceae in the ileum of HFHS and HFHS+Zn-SP mice are illustrated. The centered log-ratio (CLR)-transformed abundances are presented for each family, along with their respective ratios. In one ileum sample both Rikenellaceae and Veilonellaceae were not detected (indicated in red); therefore, this sample was not considered in ratio calculations. Statistics is according to Mann-Whitney test; \*\*,  $P<0.01$ ; \*\*\*,  $P<0.001$ ; \*\*\*\*,  $P<0.0001$ .

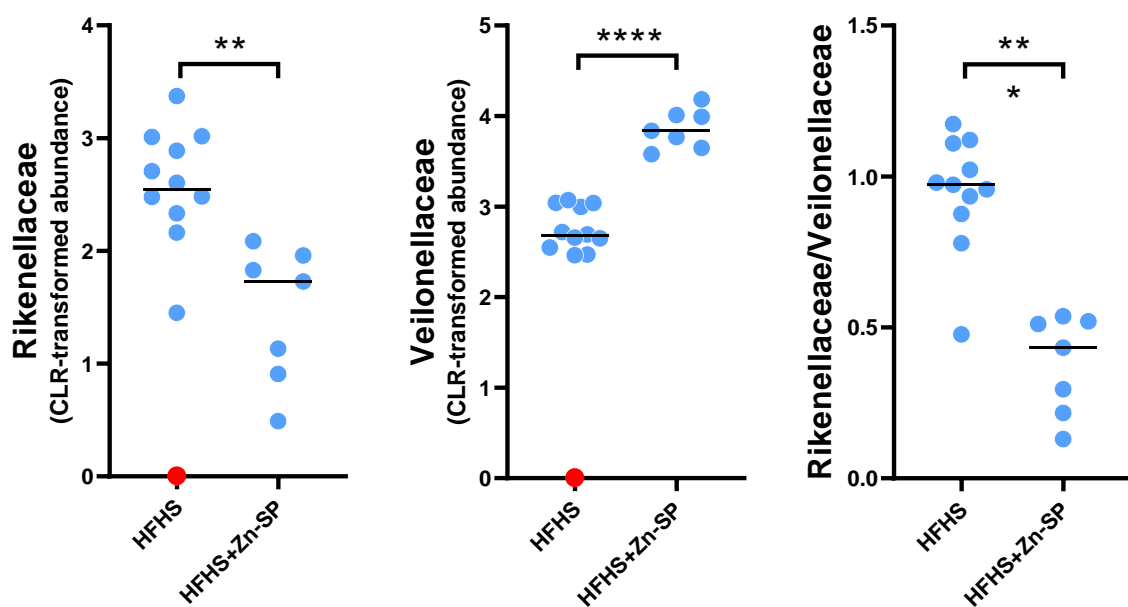

Supplement: s1 [file s1]
